# Supplementary material
Source: publisher site journal article supplement (https://www.dovepress.com/article/372343)
Supplement: Supplementary file 1 [file get_supplementary_file.php]

## Supplementary materials

A

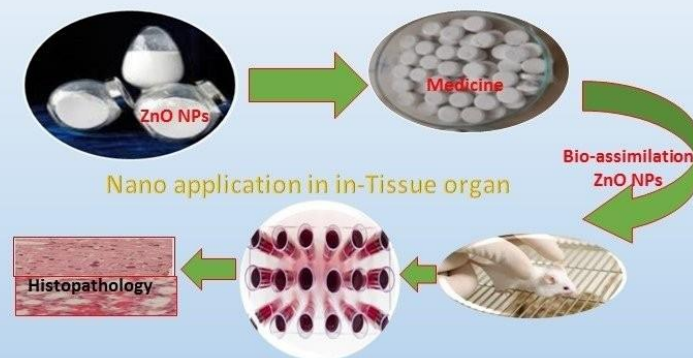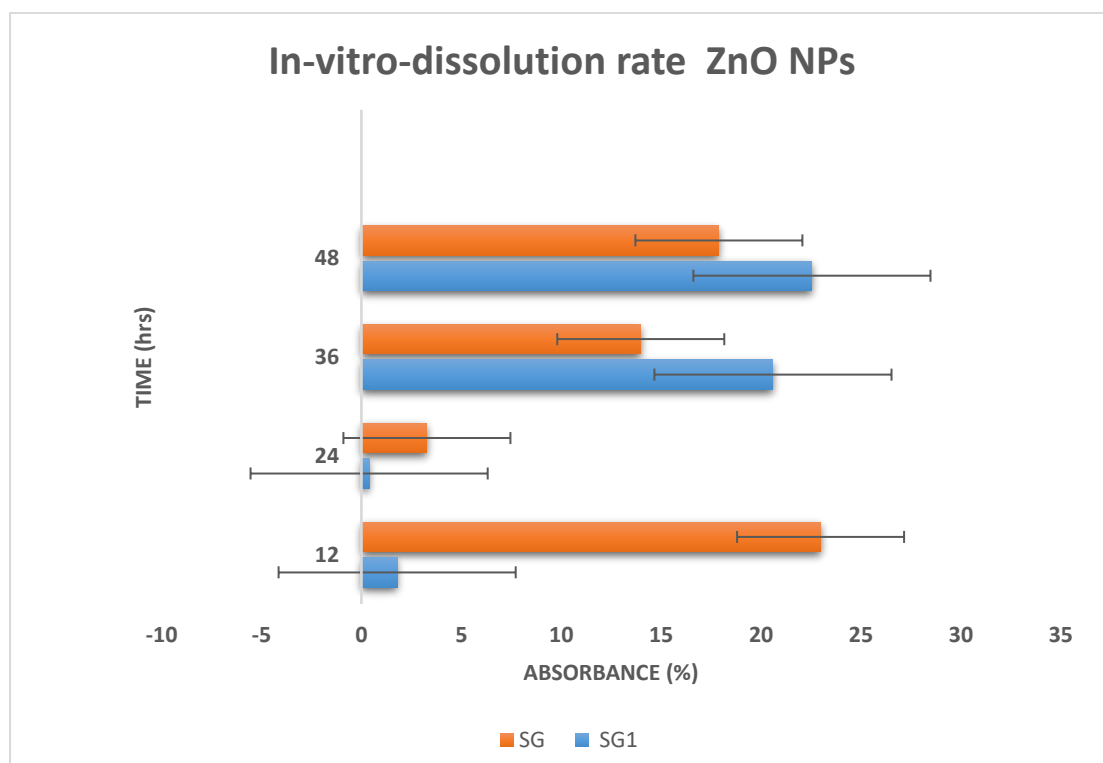

**Figure S1:** In-vitro bioavailability study. (A) Scheme. (B) Graph.

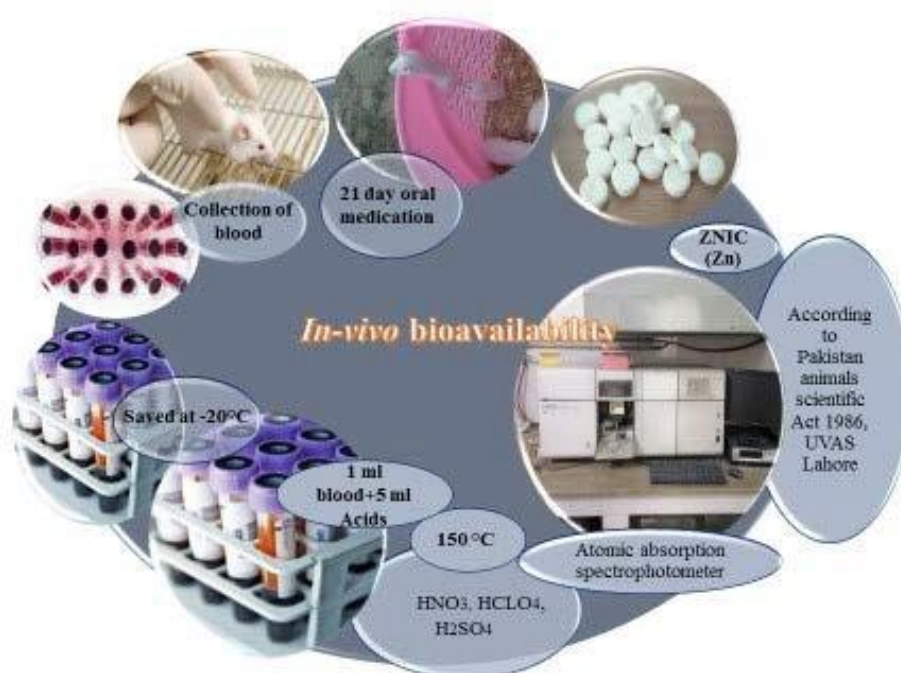

**Figure S2:** In-vivo study as additionally material.
